# Supplementary material for: Toward accelerating rare-earth metal extraction using equivariant neural networks
Source: Royal Society of Chemistry journal article supplement (doi:10.1039/d5dd00286a), 2025-11-26
Supplement: d5dd00286a1.pdf [file d5dd00286a1.pdf]

# Supporting Information:

## Toward Accelerating Rare-Earth Metal Extraction Using Equivariant Neural Networks

Ankur K. Gupta,<sup>\*</sup> Caitlin V. Hetherington, and Wibe A. de Jong<sup>\*</sup>

*Applied Mathematics and Computational Research Division, Lawrence Berkeley National  
Laboratory, Berkeley CA 94720*

E-mail: [ankur@lbl.gov](mailto:ankur@lbl.gov); [wadejong@lbl.gov](mailto:wadejong@lbl.gov)

Table S1: Charge of the four fundamental ligands present in the dataset: hydroxypyridinone (HOPO), hydroxypyridinone’s sulfur analogue (thio-HOPO), catecholamide (CAM) and catecholamide’s sulfur analogue (thio-CAM).

| Ligand    | Charge |
|-----------|--------|
| HOPO      | -1     |
| Thio-HOPO | -1     |
| CAM       | -2     |
| Thio-CAM  | -2     |

Table S2: Spin multiplicity of the 16 rare-earth element metals (Sc, Y, and lanthanides (La–Lu)) present in the dataset.

| Metal Cation     | Spin Multiplicity |
|------------------|-------------------|
| La <sup>3+</sup> | 1                 |
| Y <sup>3+</sup>  | 1                 |
| Ce <sup>3+</sup> | 2                 |
| Pr <sup>3+</sup> | 3                 |
| Nd <sup>3+</sup> | 4                 |
| Pm <sup>3+</sup> | 5                 |
| Sm <sup>3+</sup> | 6                 |
| Eu <sup>3+</sup> | 7                 |
| Gd <sup>3+</sup> | 8                 |
| Tb <sup>3+</sup> | 7                 |
| Dy <sup>3+</sup> | 6                 |
| Ho <sup>3+</sup> | 5                 |
| Er <sup>3+</sup> | 4                 |
| Tm <sup>3+</sup> | 3                 |
| Yb <sup>3+</sup> | 2                 |
| Lu <sup>3+</sup> | 1                 |

Table S3: Hyperparameters used in the Allegro model trained on absolute energies, binding energies and delta-ML energies.

| Hyperparameters                             | Allegro Model   |
|---------------------------------------------|-----------------|
| Number of layers                            | 2               |
| $l_{\max}$                                  | 2               |
| 2-body latent multi-layer perceptron (MLP)  | [8, 16, 32, 64] |
| Latent MLP                                  | [8, 16, 32, 64] |
| Final edge-energy MLP                       | [16]            |
| Tensor features (env embedded multiplicity) | 2 / 4           |

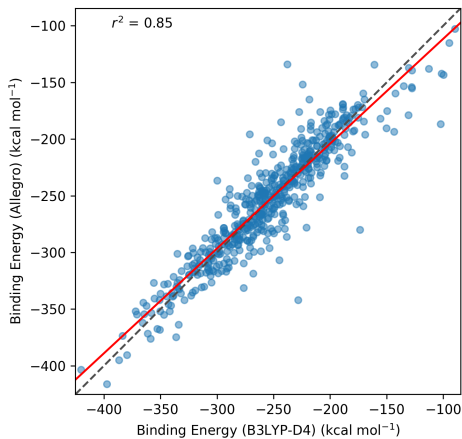

(a)

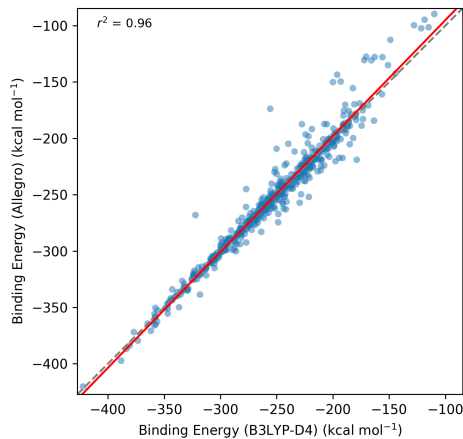

(b)

Figure S1: Parity plots comparing binding energies predicted by the Allegro model (features = 2) against DFT-calculated values (B3LYP-D4) for the test set. (a) Results using strategy 1, where absolute energies were predicted first ( $r^2 = 0.85$ ). (b) Results using strategy 2, where binding energies were predicted directly ( $r^2 = 0.96$ ). Binding energies are in kcal mol<sup>-1</sup>. The dashed black line represents perfect correlation ( $y=x$ ), while the solid red line indicates the line of best fit.

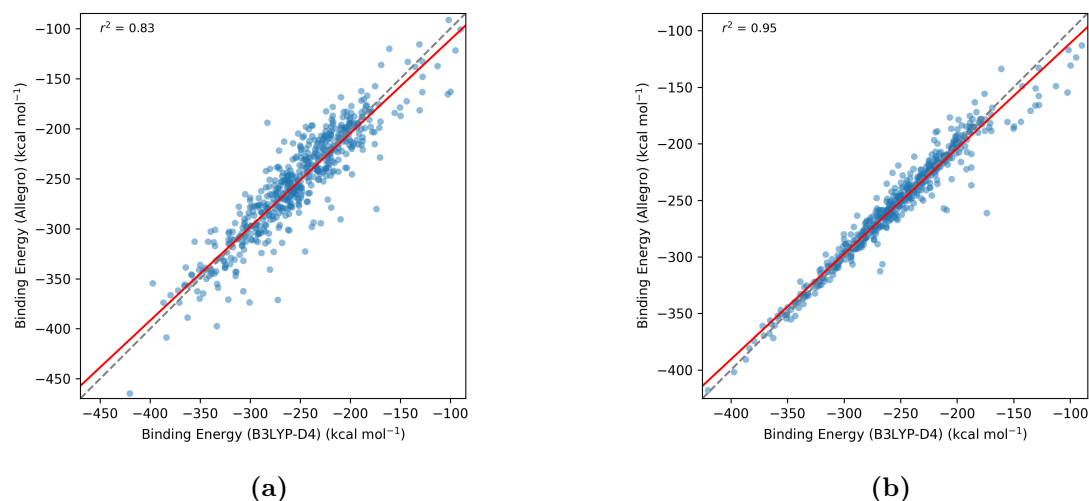

Figure S2: Parity plots comparing binding energies predicted using the Allegro (features = 2)  $\Delta$ -ML approach against DFT-calculated values (B3LYP-D4) for the test set. (a) Results using  $\Delta$ -ML strategy 1, where the correction was learned on absolute energies ( $r^2 = 0.83$ ). (b) Results using  $\Delta$ -ML strategy 2, where the correction was learned directly on binding energies ( $r^2 = 0.95$ ). Binding energies are in kcal mol<sup>-1</sup>. The dashed black line represents perfect correlation ( $y=x$ ), while the solid red line indicates the line of best fit.

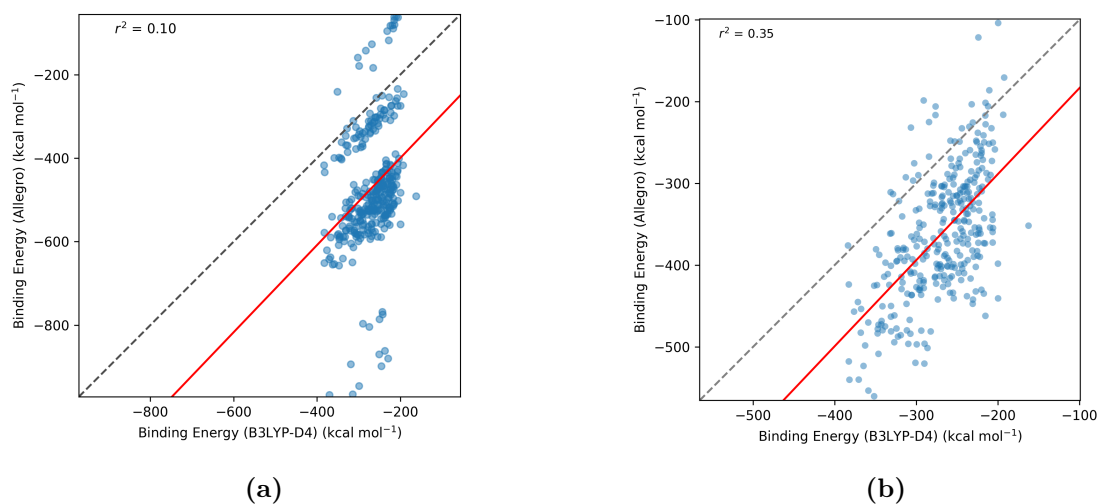

Figure S3: Parity plots comparing binding energies for the out-of-sample HDEV test set predicted using Allegro (features = 4) against DFT-calculated values (B3LYP-D4). (a) Results using strategy 1, where absolute energies were predicted first ( $r^2 = 0.10$ ). (b) Results using  $\Delta$ -ML strategy 1, where the correction was learned on absolute energies ( $r^2 = 0.35$ ). Binding energies are in kcal mol<sup>-1</sup>. The dashed black line represents perfect correlation ( $y=x$ ), while the solid red line indicates the line of best fit.

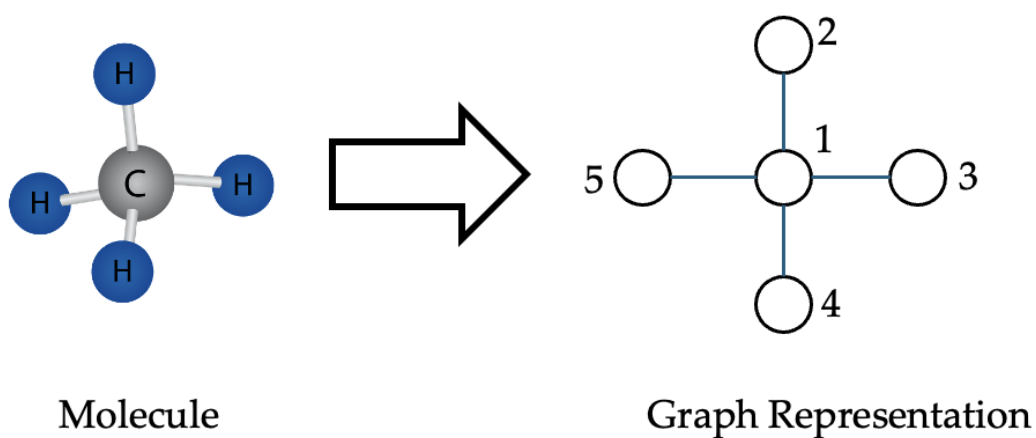

Conventional GNN per-atom:  $E = \sum_i E_i$

Allegro per-pair:  $E = \sum_i \sum_j E_{ij}$

Figure S4: Schematic of a Graph Neural Network (GNN) for chemistry. A molecule (methane, left) is represented as a graph (right), where atoms are treated as nodes and bonds as edges. The figure also contrasts the common per-atom energy decomposition ( $E = \sum_i E_i$ ) with the per-pair energy decomposition ( $E = \sum_i \sum_j E_{ij}$ ) used by the Allegro architecture.
